# Supplementary material
Source: MDPI journal article supplement (https://www.mdpi.com/2076-3417/14/1/104)
Supplement: s1 [file s1]

# **Dentin bond strength of calcium silicate-based materials: a systematic review of in vitro studies**

**Natalia Radulica <sup>1</sup>, José Luis Sanz <sup>1, \*</sup> and Adrián Lozano <sup>1</sup>**

<sup>1</sup> Department of Stomatology, Faculty of Medicine and Dentistry, Universitat de València, 46010 Valencia, Spain

\* Correspondence: jose.l.sanz@uv.es

**Table S1.** POBS results from the included studies.

| Author, year             | Cement                          | POBS results (mPa) |            |            |                                                                                 |
|--------------------------|---------------------------------|--------------------|------------|------------|---------------------------------------------------------------------------------|
|                          |                                 | Coronal            | Middle     | Apical     | Total                                                                           |
| Abdelrahman et al., 2021 | Adseal                          | 57.93±1.21         | 44.46±2.16 | 4.13±0.71  |                                                                                 |
|                          | Wellroot                        | 68.49±1.62         | 63.4±1.41  | 10.74±0.62 |                                                                                 |
|                          | Ceraseal                        | 73.5±1.88          | 67.59±1.18 | 11.6±0.51  |                                                                                 |
| Aktemur et al., 2018     | AH26                            |                    |            |            | -SL+: 1.53±0.20<br>-SL-: 1.53±0.22                                              |
|                          | BioRoot RCS                     |                    |            |            | -SL+: 2.03±0.47<br>-SL-: 1.97±0.46                                              |
|                          | MTA Plus                        |                    |            |            | -SL+: 2.02±0.55<br>-SL-: 1.58±0.41                                              |
|                          | EndoSequence putty fast-set:    |                    |            |            | -NaOCl: 93.6±7.73<br>-CHX: 110.74±8.09<br>-Saline: 131.26±26.68                 |
|                          | EndoSequence pasta premezclada: |                    |            |            | -NaOCl: 8.65±2.02<br>-CHX: 14.99±2.48<br>-Saline: 10.91±2.88                    |
| Al.Haddad et al., 2020   | iRoot SP                        |                    |            |            | -Control group: 2.62±1.04<br>-DiaPex Plus: 5.47±6.44<br>-Odontopaste: 9.68±5.71 |
|                          | OrthoMTA                        |                    |            |            | -Control group: 4.16±3.41<br>-DiaPex Plus: 3.49±3.74<br>-Odontopaste: 4.98±5.27 |
|                          | MTA                             |                    |            |            | -Control group: 88.14±33.43<br>-CaOH2: 58.81±16.28<br>-mTAP: 50.76±9.65         |
| Alsubait et al., 2020    | TotalFill                       |                    |            |            | -Control group: 78.18±11.65<br>-CaOH2: 69.19±37.47<br>-mTAP: 70.85±23.34        |

**Table S1.** *Cont.*

| Author,<br>year         | Cement         | POBS results (mPa)              |                                 |                                 |                                   |
|-------------------------|----------------|---------------------------------|---------------------------------|---------------------------------|-----------------------------------|
|                         |                | Coronal                         | Middle                          | Apical                          | Total                             |
| Anju et al.,<br>2022    | NeoMTA Plus    | -EDTA: 6.554±1.32               | -EDTA: 4.949±1.68               | -EDTA: 3.639±0.59               |                                   |
|                         |                | -HEDP: 5.074±1.12               | -HEDP: 3.648±0.88               | -HEDP: 2.963±1.15               |                                   |
|                         |                | -MA: 6.559±1.50                 | -MA: 4.864±1.21                 | -MA: 3.677±0.83                 |                                   |
|                         |                | -Saline: 4.764±0.63             | -Saline: 3.034±0.78             | -Saline: 2.143±1.42             |                                   |
| Bago et al.,<br>2022    | BioRoot RCS    | -CI+ NaOCl:<br>0.64±0.39        | -CI+ NaOCl:<br>0.66±0.80        | -CI+ NaOCl:<br>1.57±1.06        |                                   |
|                         |                | -PIPS: 0.17±0.06.               | -PIPS: 0.27±0.21                | -PIPS: 1.06±1.17                |                                   |
|                         |                | -CI + diode laser:<br>0.94±0.58 | -CI + diode laser:<br>2.60±0.73 | -CI + diode laser:<br>5.08±2.38 |                                   |
|                         |                | -PDT: 0.62±0.74                 | -PDT: 0.35±0.20                 | -PDT: 1.25±1.36                 |                                   |
|                         |                | -CI + CHX:<br>0.46±0.30         | -CI + CHX:<br>0.66±0.35         | -CI + CHX:<br>0.78±0.46         |                                   |
|                         |                | -Control: 0.28±0.04             | -Control: 0.23±0.13             | -Control: 2.41±1.08             |                                   |
|                         |                |                                 |                                 |                                 | -Conventional<br>method: 3.33±1.8 |
| Bogari et<br>al., 2022  | TotalFill BC   |                                 |                                 |                                 | -US: 4.21±2.2                     |
|                         |                |                                 |                                 |                                 | -Laser method:<br>6.46±0.5        |
| Cardoso et<br>al., 2022 | AH Plus:       |                                 |                                 |                                 | -Gpp: 0.84±1.23                   |
|                         |                |                                 |                                 |                                 | -G95E: 1.24±0.94                  |
|                         | Sealer Plus BC |                                 |                                 |                                 | -G70E: 1.16±1.25                  |
|                         |                |                                 |                                 |                                 | -Gpp: 0.71±0.65                   |
|                         |                |                                 |                                 |                                 | -G95E: 0.85±0.69                  |
|                         |                |                                 |                                 |                                 | -G70E: 1.34 ±. 1.38               |

**Table S1. Cont.**

| Author,<br>year          | Cement                 | POBS results (mPa) |        |        |                                     |
|--------------------------|------------------------|--------------------|--------|--------|-------------------------------------|
|                          |                        | Coronal            | Middle | Apical | Total                               |
| Celik et al.,<br>2021    | AH Plus                |                    |        |        | -NaOCl and EDTA:<br>8.12±2.37       |
|                          |                        |                    |        |        | -NaOCl and CHX:<br>12.87±3.89       |
|                          |                        |                    |        |        | -NaOCl, EDTA and<br>CHX: 10.54±4.65 |
|                          |                        |                    |        |        | -Distilled water:<br>6.68±2.59      |
|                          | Endoseal MTA           |                    |        |        | -NaOCl and EDTA:<br>5.98±2.2        |
|                          |                        |                    |        |        | -NaOCl and CHX:<br>6.07±2.25        |
|                          |                        |                    |        |        | -NaOCl, EDTA and<br>CHX: 6.87±3.63  |
|                          |                        |                    |        |        | -Distilled water:<br>5.22±1.6       |
|                          | Tech Biosealer<br>Endo |                    |        |        | -NaOCl and EDTA:<br>4.02±0.96       |
|                          |                        |                    |        |        | -NaOCl and CHX:<br>5.17±2.1         |
|                          |                        |                    |        |        | -NaOCl, EDTA and<br>CHX: 5.19±2.11  |
|                          |                        |                    |        |        | -Distilled water:<br>4.41±1.39      |
| Chisnoiu et<br>al., 2021 | RS                     |                    |        |        | 1.0062±0.90                         |
|                          | E1-DCR                 |                    |        |        | 0.8294±0.18                         |
|                          | E2-BC                  |                    |        |        | 0.9322±0.25                         |
|                          | TF-BC                  |                    |        |        | 1.4367±1.05                         |
| Cimpean et<br>al., 2022  | RSSE                   |                    |        |        | 1.059±1.240                         |
|                          | EBCS                   |                    |        |        | 2.803 ± 1.756                       |
|                          | EDS                    |                    |        |        | 4.092±2.232                         |
|                          | BRS                    |                    |        |        | 2.038±1.672                         |

Table S1. Cont.

| Author, year             | Cement            | POBS results (mPa)                 |        |        |
|--------------------------|-------------------|------------------------------------|--------|--------|
|                          |                   | Coronal                            | Middle | Apical |
| Dabaj et al., 2018       | AH                | CLC: 17.48±7.131<br>C: 9.573±7.291 |        |        |
|                          | ES                | CLC: 3.56±1.703<br>C: 3.127±2.286  |        |        |
| Dem et al., 2019         | GuttaFlow 2       | 0.43±0.37                          |        |        |
|                          | GuttaFlow Bioseal | 1.17±0.47                          |        |        |
|                          | AH Plus           | 12.20±4.90                         |        |        |
| Donnermeyer et al., 2018 | AH Plus           | 7.03±2.41                          |        |        |
|                          | TotaFill BC       | 3.52±1.41                          |        |        |
|                          | Endo CPM          | 1.60±0.83                          |        |        |
|                          | BioRoot RCS       | 2.31±1.31                          |        |        |
| Falakaloglu et al., 2022 | BC HiFlow         | SC                                 |        |        |
|                          |                   | -5mm: 5.28                         |        |        |
|                          |                   | -10mm: 2.34                        |        |        |
|                          |                   | WVC                                |        |        |
|                          |                   | -5mm: 5.43                         |        |        |
|                          |                   | -10 mm: 2.25                       |        |        |
|                          | CeraSeal          | SC                                 |        |        |
|                          |                   | -5mm: 5.24                         |        |        |
|                          |                   | -10 mm: 2.17                       |        |        |
|                          |                   | WVC                                |        |        |
|                          |                   | -5mm: 5.17                         |        |        |
|                          |                   | -10 mm: 2.24                       |        |        |
|                          | BioRoot           | SC                                 |        |        |
|                          |                   | -5mm: 5.18                         |        |        |
|                          |                   | -10 mm: 2.26                       |        |        |
|                          |                   | WVC                                |        |        |
|                          |                   | -5mm: 3.32                         |        |        |
|                          |                   | -10 mm: 1.28                       |        |        |

**Table S1. Cont.**

| Author,<br>year            | Cement               | POBS results (mPa) |             |             |                                |
|----------------------------|----------------------|--------------------|-------------|-------------|--------------------------------|
|                            |                      | Coronal            | Middle      | Apical      | Total                          |
| Grazziotin<br>et al., 2020 | AH Plus              |                    |             |             | -NbG: 4.51±2.6                 |
|                            |                      |                    |             |             | -45S5: 7.14±3.9                |
|                            |                      |                    |             |             | -CaOH2: 7.13±2.7               |
|                            |                      |                    |             |             | -Control: 11.33±3.5            |
|                            | MTA Fillapex         |                    |             |             | -NbG: 0.33±1.68                |
|                            |                      |                    |             |             | -45S5: 0.15±0.5                |
|                            |                      |                    |             |             | -CaOH2: 0.97±0.7               |
|                            |                      |                    |             |             | -Control: 0.38±0.2             |
| Gundogar<br>et al., 2019   | Endosequence         |                    |             |             | -2.5% NaOCl:                   |
|                            |                      |                    |             |             | 1.18±0.59                      |
|                            |                      |                    |             |             | -17% EDTA:                     |
|                            |                      |                    |             |             | 2.51±0.42                      |
|                            |                      |                    |             |             | -2% clorhexidina:              |
|                            |                      |                    |             |             | 2±0.56                         |
| Hashem et<br>al., 2020     | AH Plus              |                    |             |             | -QMix 2 en 1:                  |
|                            |                      |                    |             |             | 3.49±0.61                      |
|                            |                      |                    |             |             | Photodynamic<br>therapy:       |
|                            |                      |                    |             |             | -DW+UI: 3.12±0.73              |
|                            |                      |                    |             |             | -17% EDTA:                     |
|                            |                      |                    |             |             | 7.49±1.17                      |
|                            | MTA Fillapex         |                    |             |             | -2% CHX: 6.25±1.89             |
|                            |                      |                    |             |             | Photobiomodulation<br>therapy: |
|                            |                      |                    |             |             | -DW+UI: 3.82±0.88              |
|                            |                      |                    |             |             | -17% EDTA:                     |
|                            |                      |                    |             |             | 7.61±1.42                      |
|                            |                      |                    |             |             | -2% CHX: 5.98±1.37             |
| Khalil et al.,<br>2019     | GuttaFlow<br>bioseal | 1.690±0.022        | 2.077±0.129 | 2.374±0.017 | Photodynamic<br>therapy:       |
|                            |                      |                    |             |             | -DW+UI: 1.03±0.15              |
|                            |                      |                    |             |             | -17% EDTA:                     |
|                            |                      |                    |             |             | 2.62±0.87                      |
|                            | Zical                | 4.254±0.017        | 4.360±0.022 | 7.300±0.022 | -2% CHX: 1.73±0.71             |
|                            |                      |                    |             |             | Photobiomodulation<br>therapy: |
|                            |                      |                    |             |             | -DW+UI: 1.19±0.20              |
|                            |                      |                    |             |             | -17% EDTA:                     |
|                            |                      |                    |             |             | 2.45±0.56                      |
|                            |                      |                    |             |             | -2% CHX: 1.49±0.63             |

**Table S1. Cont.**

| Author,<br>year         | Cement             | POBS results (mPa)                  |                                     |                                     |       |
|-------------------------|--------------------|-------------------------------------|-------------------------------------|-------------------------------------|-------|
|                         |                    | Coronal                             | Middle                              | Apical                              | Total |
| Khurana et<br>al., 2019 | AH Plus            | Paper points:<br>4.29±0.06          | Paper points:<br>3.32±0.07          | Paper points:<br>2.27±0.07          |       |
|                         |                    | 70% isopropyl<br>alcohol: 4.66±0.06 | 70% isopropyl<br>alcohol: 4.24±0.06 | 70% isopropyl<br>alcohol: 2.80±0.05 |       |
|                         |                    |                                     |                                     |                                     |       |
|                         | EndoSequence<br>BC | Paper points:<br>4.63±0.06          | Paper points:<br>3.65±0.07          | Paper points:<br>2.59±0.06          |       |
|                         |                    | 70% isopropyl<br>alcohol: 4.97±0.06 | 70% isopropyl<br>alcohol: 4.59±0.06 | 70% isopropyl<br>alcohol: 3.09±0.06 |       |
|                         |                    |                                     |                                     |                                     |       |
|                         | MTA Fillapex       | Paper points:<br>1.53±0.06          | Paper points:<br>0.95±0.06          | Paper points:<br>0.65±0.06          |       |
|                         |                    | 70% isopropyl<br>alcohol: 1.98±0.05 | 70% isopropyl<br>alcohol: 1.51±0.06 | 70% isopropyl<br>alcohol: 1.07±0.06 |       |
|                         |                    |                                     |                                     |                                     |       |
| Küden et<br>al., 2022   | AH Plus            | -NaOCl/EDTA:<br>2.88±0.67           | -NaOCl/EDTA:<br>1.88±0.38           |                                     |       |
|                         |                    | -PDT + methylene<br>blue: 3.1±0.65  | -PDT + methylene<br>blue: 1.85±0.40 |                                     |       |
|                         |                    | -PDT + curcumin:<br>2.21±0.51       | -PDT + curcumin:<br>1.44±0.37       |                                     |       |
|                         |                    | -PDT + toluidine<br>blue: 2.58±0.57 | -PDT + toluidine<br>blue: 1.52±0.28 |                                     |       |
|                         |                    |                                     |                                     |                                     |       |
|                         | BioRoot RCS        | -NaOCl/EDTA:<br>3.64±0.96           | -NaOCl/EDTA:<br>2.11±0.39           |                                     |       |
|                         |                    | -PDT + methylene<br>blue: 4.43±0.65 | -PDT + methylene<br>blue: 2.44±0.47 |                                     |       |
|                         |                    | -PDT + curcumin:<br>3.67±0.74       | -PDT + curcumin:<br>2.26±0.46       |                                     |       |
|                         |                    | -PDT + toluidine<br>blue: 3.26±0.67 | -PDT + toluidine<br>blue: 2.36±0.38 |                                     |       |
| Kurup et<br>al., 2021   | AH Plus            | 18.6±3.76                           | 14.04±3.24                          | 15.75±4.09                          |       |
|                         | MTA Fillapex:      | 6.03±1.27                           | 10.76±4.13                          | 10.87±6.31                          |       |
|                         | Apexit Plus:       | 6.21±1.3                            | 11.34±3.67                          | 11.73±6.12                          |       |

Table S1. Cont.

| Author, year              | Cement      | POBS results (mPa)                      |                                        |                                        |                     |
|---------------------------|-------------|-----------------------------------------|----------------------------------------|----------------------------------------|---------------------|
|                           |             | Coronal                                 | Middle                                 | Apical                                 | Total               |
| Marquezan et al., 2018    | MTA-Angelus |                                         |                                        |                                        | -Uncontaminated:    |
|                           |             |                                         |                                        |                                        | 24h: 0.34           |
|                           |             |                                         |                                        |                                        | 7d: 1.40            |
|                           |             |                                         |                                        |                                        | 28d: 3.46           |
|                           |             |                                         |                                        |                                        | -Contaminated:      |
|                           | BD          |                                         |                                        |                                        | 24h: 1.84           |
|                           |             |                                         |                                        |                                        | 7d: 1.69            |
|                           |             |                                         |                                        |                                        | 28d: 1.39           |
|                           |             |                                         |                                        |                                        | -Uncontaminated:    |
|                           |             |                                         |                                        |                                        | 24h: 8.89           |
| Moinuddin et al., 2019    | AH Plus     | Lateral condensation: 7.27±1.2          | Lateral condensation: 6.18±1.87        | Lateral condensation: 4.48±1.76        |                     |
|                           |             | Thermoplasticized technique: 10.34±4.00 | Thermoplasticized technique: 8.87±3.36 | Thermoplasticized technique: 5.31±2.79 |                     |
|                           |             | Single cone: 12.70±4.12                 | Single cone: 10.60±2.84                | Single cone: 6.48±2.38                 |                     |
|                           | BC          | SCO (SAH): 1.091±0.460                  | SCO (SAH): 1.087±0.534                 | SCO (SAH): 1.551±0.518                 |                     |
|                           |             | CLC (LAH): 1.308±0.466                  | CLC (LAH): 1.199±0.395                 | CLC (LAH): 1.388±0.658                 |                     |
|                           |             | SCO (SS): 1.455±0.500                   | SCO (SS): 1.639±0.766                  | SCO (SS): 2.614±1.016                  |                     |
| Nouroloyouni et al., 2023 | AH Plus     | CLC (LS): 1.993±0.969                   | CLC (LS): 2.827±1.357                  | CLC (LS): 3.102±1.140                  |                     |
|                           | SSR         |                                         |                                        |                                        |                     |
|                           |             |                                         |                                        |                                        |                     |
|                           |             |                                         |                                        |                                        |                     |
|                           |             |                                         |                                        |                                        |                     |
|                           |             |                                         |                                        |                                        |                     |
| Oktay et al., 2018        |             |                                         |                                        |                                        | -CH: 6.20±0.69      |
|                           |             |                                         |                                        |                                        | -TAP: 6.35±0.68     |
|                           |             |                                         |                                        |                                        | -DAP: 5.62±0.66     |
|                           |             |                                         |                                        |                                        | -mTAP: 5.03±0.63    |
|                           |             |                                         |                                        |                                        | -Control: 4.99±0.46 |



**Table S1. Cont.**

| Author,<br>year           | Cement       | POBS results (mPa) |            |           |       |                  |
|---------------------------|--------------|--------------------|------------|-----------|-------|------------------|
|                           |              | Coronal            | Middle     | Apical    | Total |                  |
| Paulo et al.,<br>2021     | MTA          | 4.97               | 8.22±3.34  | 7.98±4.28 |       |                  |
|                           | Biodentine   | 9.10               | 9.54±5.53  | 6.83±3.68 |       |                  |
|                           | TotalFill BC | 8.64               | 10.77±4.95 | 9.56±3.81 |       |                  |
| Pawar et al.,<br>2022     | GP-AH        |                    |            |           |       | PTN              |
|                           |              |                    |            |           |       | SN: 1.4±0.3      |
|                           |              |                    |            |           |       | PUI: 1.7±0.3     |
|                           |              |                    |            |           |       | SA: 1.6±0.3      |
|                           |              |                    |            |           |       | WO               |
|                           |              |                    |            |           |       | SN: 1.8±0.3      |
|                           |              |                    |            |           |       | PUI: 2.0±0.3     |
|                           |              |                    |            |           |       | SA: 1.9±0.2      |
|                           |              |                    |            |           |       | SAF              |
|                           |              |                    |            |           |       | SN: 2.9±0.5      |
|                           |              |                    |            |           |       | PUI: 3.0±0.7     |
|                           |              |                    |            |           |       | SA: 2.5±0.3      |
|                           | C-EBC        |                    |            |           |       | PTN              |
|                           |              |                    |            |           |       | SN: 1.6±0.3      |
|                           |              |                    |            |           |       | PUI: 2.0±0.6     |
|                           |              |                    |            |           |       | SA: 1.9±0.4      |
|                           |              |                    |            |           |       | WO               |
|                           |              |                    |            |           |       | SN: 3.1±0.4      |
|                           |              |                    |            |           |       | PUI: 3.3±0.3     |
|                           |              |                    |            |           |       | SA: 3.1±0.4      |
|                           |              |                    |            |           |       | SAF              |
|                           |              |                    |            |           |       | SN: 4.6±0.5      |
|                           |              |                    |            |           |       | PUI: 4.9±0.3     |
|                           |              |                    |            |           |       | SA: 4.2±0.5      |
| Putrianti et<br>al., 2020 | BioRoot RCS  |                    |            |           |       | Grupo 1: 19.6500 |
|                           |              |                    |            |           |       | Grupo 2: 8.7100  |

**Table S1.** *Cont.*

| Author,<br>year                  | Cement             | POBS results (mPa) |        |        |                                                                |
|----------------------------------|--------------------|--------------------|--------|--------|----------------------------------------------------------------|
|                                  |                    | Coronal            | Middle | Apical | Total                                                          |
| Retana -<br>Lobo et al.,<br>2021 | AH Plus            |                    |        |        | -GP-S: 3.959±1.12<br>-S: 4.897±0.84                            |
|                                  | EndoSequence<br>BC |                    |        |        | -GP-S: 3.223 ±1.06<br>-S: 4.579±1.45                           |
|                                  | ProRoot ES         |                    |        |        | -GP-S: 3.267±1.19<br>-S: 4.953±1.59                            |
|                                  | BioRoot RCS        |                    |        |        | -GP-S: 3.522±1.40<br>-S: 5.576±1.68                            |
|                                  |                    |                    |        |        |                                                                |
| Rifaat et al.,<br>2022           | AH Plus            |                    |        |        | -EDTA: 0.881±0.52<br>-Maleic: 2.377±0.19<br>-H3PO4: 1.915±0.19 |
|                                  | EndoSeal MTA       |                    |        |        | -EDTA: 1.379±0.22<br>-Maleic: 1.317±0.27<br>-H3PO4: 0.494±0.13 |
|                                  |                    |                    |        |        |                                                                |
| Rodrigues<br>et al., 2021        | Biodentine         |                    |        |        | 14.79                                                          |
|                                  | MTA Repair<br>HP   |                    |        |        | 8.84                                                           |
|                                  | Bio-C Repair       |                    |        |        | 3.48                                                           |
| Roy et al.,<br>2022              | AH Plus            |                    |        |        | Control: 164±174.9<br>CHX al 2%: 84.7±69                       |
|                                  | BioRoot RCS        |                    |        |        | Control: 88.9±75.5<br>CHX al 2%:<br>93.1±83.8                  |
|                                  | GuttaFlow 2        |                    |        |        | Control: 73±90<br>CHX al 2%:<br>2:73.9±77.1                    |
|                                  |                    |                    |        |        |                                                                |

**Table S1.** *Cont.*

| Author,<br>year       | Cement       | POBS results (mPa) |        |        |                                             |
|-----------------------|--------------|--------------------|--------|--------|---------------------------------------------|
|                       |              | Coronal            | Middle | Apical | Total                                       |
| Sarrafan et al., 2023 | AH26         |                    |        |        | -Ethanol: 5.61±2.27                         |
|                       |              |                    |        |        | -Paper points: 3.10±1.88                    |
|                       |              |                    |        |        | -Luer Vacuum: 1.41±0.67                     |
|                       |              |                    |        |        | -Control: 1.31±0.61                         |
|                       | MTA Fillapex |                    |        |        | -Ethanol: 1.46±1.12                         |
|                       |              |                    |        |        | - Paper points: 1.82±1.32                   |
|                       |              |                    |        |        | - Luer Vacuum: 1.07±0.56                    |
|                       |              |                    |        |        | -Control: 1.70±1.00                         |
|                       | Endoseal MTA |                    |        |        | Ethanol: 2.73±1.78                          |
|                       |              |                    |        |        | Paper points: 1.94±1.39                     |
|                       |              |                    |        |        | Luer Vacuum: 1.52±0.79                      |
|                       |              |                    |        |        | Control: 2.36±2.21                          |
| Sfeir et al., 2023    | SureSeal     |                    |        |        | Etanol: 4.69±1.76                           |
|                       |              |                    |        |        | Paper points: 8.07±3.14                     |
|                       |              |                    |        |        | Luer Vacuum: 1.34±0.82                      |
|                       |              |                    |        |        | Control: 1.72±1.28                          |
|                       | AH Plus      |                    |        |        | -1A (GP 0.04): 3.10±0.33                    |
|                       |              |                    |        |        | -1B (GP 0.06): 3.23±0.21                    |
|                       |              |                    |        |        | 2A (GP 0.04): 2.94±0.28                     |
|                       |              |                    |        |        | 2B (GP 0.06): 3.09±0.14                     |
|                       | BioRoot RCS  |                    |        |        | -Paper points: 2.04±0.03                    |
|                       |              |                    |        |        | -Paper points + 95% ethanol: 1.95±0.03.     |
|                       |              |                    |        |        | -Paper points + 70% isopropanol: 1.56±0.03. |
|                       |              |                    |        |        | -Air-blowing thermostatic oven: 0.68±0.04.  |
| Wang et al., 2023     | iRoot SP     |                    |        |        | -Paper points: 2.04±0.03                    |
|                       |              |                    |        |        | -Paper points + 95% ethanol: 1.95±0.03.     |
|                       |              |                    |        |        | -Paper points + 70% isopropanol: 1.56±0.03. |
|                       |              |                    |        |        | -Air-blowing thermostatic oven: 0.68±0.04.  |

Table S1. Cont.

| Author,<br>year          | Cement                | POBS results (mPa)             |                               |        |       |
|--------------------------|-----------------------|--------------------------------|-------------------------------|--------|-------|
|                          |                       | Coronal                        | Middle                        | Apical | Total |
| Yaghmoor<br>et al., 2020 | MTA                   | -Control: 6.81±2.4             | -Control: 3.58±0.9            |        |       |
|                          |                       | -CaOH <sub>2</sub> : 10.14±3.4 | -CaOH <sub>2</sub> : 9.15±3.4 |        |       |
|                          |                       | -1.000 mg/mL                   | -1.000 mg/mL                  |        |       |
|                          |                       | TAP: 6.04±2.2                  | TAP: 3.92±1.3                 |        |       |
|                          |                       | -1mg/mL TAP:                   | -1mg/mL TAP:                  |        |       |
|                          |                       | 10.12±2.4                      | 8.36±1.7                      |        |       |
|                          |                       | -1.000 mg/mL                   | -1.000 mg/mL                  |        |       |
|                          |                       | DAP: 2.22±0.6                  | DAP: 2.74±1.1                 |        |       |
|                          | Biodentine            | -1 mg/mL DAP:                  | -1 mg/mL DAP:                 |        |       |
|                          |                       | 10.56±2.2                      | 8.18±1.7                      |        |       |
|                          |                       | Control: 7.63±2.5              | Control: 4.88±1.8             |        |       |
|                          |                       | CaOH <sub>2</sub> : 11.59±3.5  | CaOH <sub>2</sub> : 8.22±2.9  |        |       |
|                          |                       | 1.000 mg/mL TAP:               | 1.000 mg/mL                   |        |       |
|                          |                       | 12.55±4.5                      | TAP: 7.63±3.7                 |        |       |
|                          |                       | 1mg/mL TAP:                    | 1mg/mL TAP:                   |        |       |
|                          |                       | 11.47±1.4                      | 9.39±3.7                      |        |       |
|                          | Endosequence<br>putty | 1.000 mg/mL DAP:               | 1.000 mg/mL                   |        |       |
|                          |                       | 10.26±2.4                      | DAP: 10.69±3.2                |        |       |
|                          |                       | 1 mg/mL DAP:                   | 1 mg/mL DAP:                  |        |       |
|                          |                       | 15.34±2.7                      | 13.98±1.9                     |        |       |
|                          |                       | Control: 10.7±1.3              | Control: 8.53±1.2             |        |       |
|                          |                       | CaOH <sub>2</sub> : 11.58±2.2  | CaOH <sub>2</sub> : 10.00±1.6 |        |       |
|                          |                       | 1.000 mg/mL TAP:               | 1.000 mg/mL                   |        |       |
|                          |                       | 9.73±3.2                       | TAP: 8.99±3.1                 |        |       |
|                          | AH Plus               | 1mg/mL TAP:                    | 1mg/mL TAP:                   |        |       |
|                          |                       | 11.48±0.7                      | 8.65±1.9                      |        |       |
|                          |                       | 1.000 mg/mL DAP:               | 1.000 mg/mL                   |        |       |
|                          |                       | 9.51±2.7                       | DAP: 9.69±2.0                 |        |       |
|                          | Endosequence<br>BC    | 1 mg/mL DAP:                   | 1 mg/mL DAP:                  |        |       |
|                          |                       | 13.32±1.4                      | 11.59±2.4                     |        |       |
|                          |                       | GP: 3.262 ± 1.409              | GP: 2.455 ± 1.575             |        |       |
|                          |                       | GP after NAP:                  | GP after NAP:                 |        |       |
|                          |                       | 5.018±1.816                    | 3.322 ± 0.870                 |        |       |
|                          |                       | GP: 5.33 ± 5.83                | GP: 5.34 ± 5.39               |        |       |
|                          |                       | GP after                       | GP after NAP:                 |        |       |
|                          |                       | NAP:11.14 ± 11.44              | 12.73 ± 10.89                 |        |       |
